# Supplementary material for: CD200 Induces Epithelial-to-Mesenchymal Transition in Head and Neck Squamous Cell Carcinoma via β-Catenin-Mediated Nuclear Translocation
Source: Cancers (Basel). 2019 Oct 17;11(10):1583. doi: 10.3390/cancers11101583 (PMC6826410; doi:10.3390/cancers11101583)
Supplement: Supplementary file 1 [file cancers-11-01583-s001.pdf]

# Supplementary Materials: CD200 Induces Epithelial-to-Mesenchymal Transition in Head and Neck Squamous Cell Carcinoma via $\beta$ -catenin-Mediated Nuclear Translocation

Seung-Phil Shin, A-RA Goh, Hyeon-Gu Kang, Seok-Jun Kim, Jong-Kwang Kim, Kyung-Tae Kim, John H Lee, Yong-Soo Bae, Yuh-Seog Jung and Sang-Jin Lee

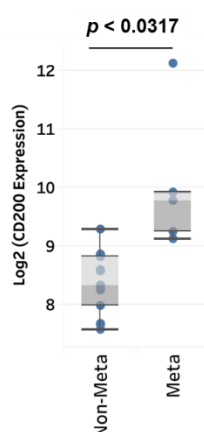

**Figure S1.** The CD200 expression in metastatic HNSCC patients. CD200 gene expression of metastatic HNSCC is elevated in comparison to that of non-metastatic tumors (two sample *t*-test *p*-value < 0.001) in an independent set of 12 samples on microarrays (GEO accession id, GSE2370). To elucidate a clinical implication of the high CD200 gene expression in head and neck cancer, we downloaded a public dataset of microarray (Affymetrix U95A microarrays) containing 14 non-/metastatic head and neck squamous cell carcinoma from GEO database (accession number: GSE2370). We converted CD200 (probe id: 37716\_at) expression level into log2 scale and used two sample *t*-test with a significance level of 0.01 to test for the difference in mean CD200 expression between non- and metastasis groups.

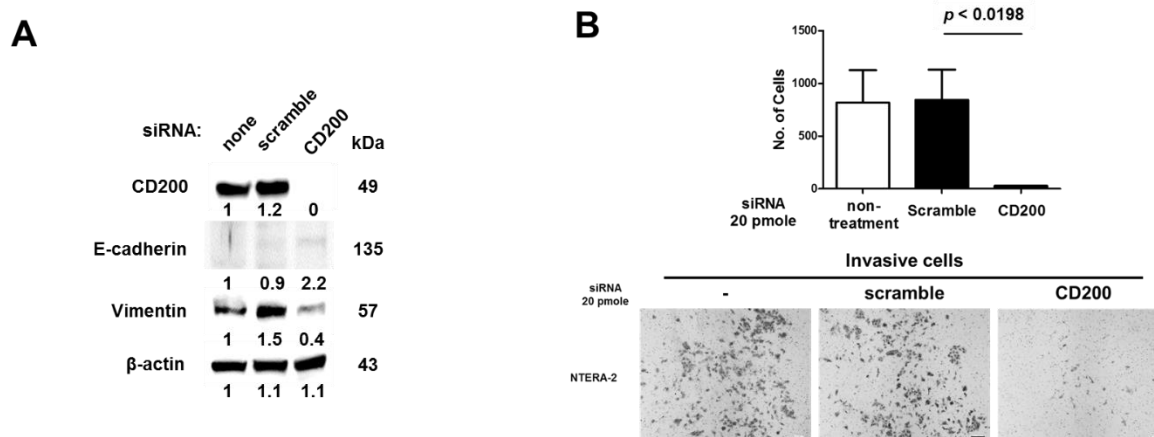

**Figure S2.** The EMT features in endogenously CD200-expressing NTERA cell. (A) The CD200 endogenous expression cell line, NTERA-2, was exposed to 20 pmoles of siRNA (scramble or CD200) for 48 hours. The cells were then digested with RIPA buffer and quantitated. Western blot analysis was performed at 30  $\mu$ g per sample. The changes of EMT gene by siRNA treatment were detected as anti-CD200, anti-E-cadherin, anti-vimentin and anti- $\beta$ -actin. (B) siRNA treatment for NTERA-2 is the same as supplementary figure 1b. Then, each  $1 \times 10^5$  cells were added to the matrigel-coated transwell

and incubated for 48 hours. The invaded cells were stained with crystal violet, and then stained cells were directly counted using a microscope (100  $\mu\text{m}$  scale bar). Each error bar in the graph represents the average of three independent experiments (mean  $\pm$  SEM).

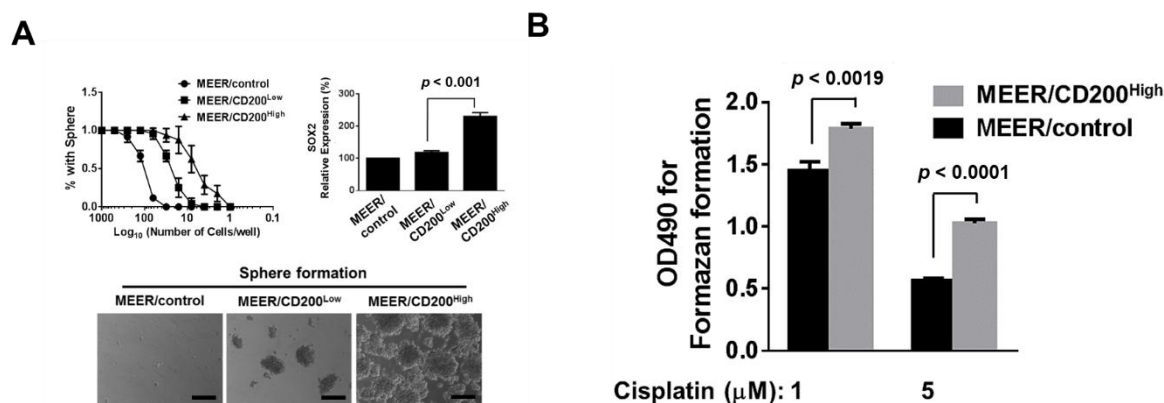

**Figure S3.** Formation and cisplatin-responsiveness of CD200-overexpressing MEER cell. **(A)** A different number of each cell type was cultured in a suspension media for 7 days. We then counted under a microscope how many spheres were formed and plotted the results (upper left). Total RNA from each cell line was prepared for SOX2 qRT-PCR analysis (mean  $\pm$  SEM;  $n = 3$ ). P values were determined by two-tailed paired *t*-tests (upper right). Cells were cultured in the suspension media and monitored for sphere formation after 7 days (100  $\mu\text{m}$  scale bar, bottom). **(B)** After  $1 \times 10^5$  cells/well were treated with 1 or 5  $\mu\text{M}$  cisplatin for 48 h, cell viability by MTS assay was determined as a percentage of cells compared to the no-treatment control (mean  $\pm$  SEM;  $n = 3$ ) in three independent experiments. Results were analyzed by two-tailed, paired *t*-tests.

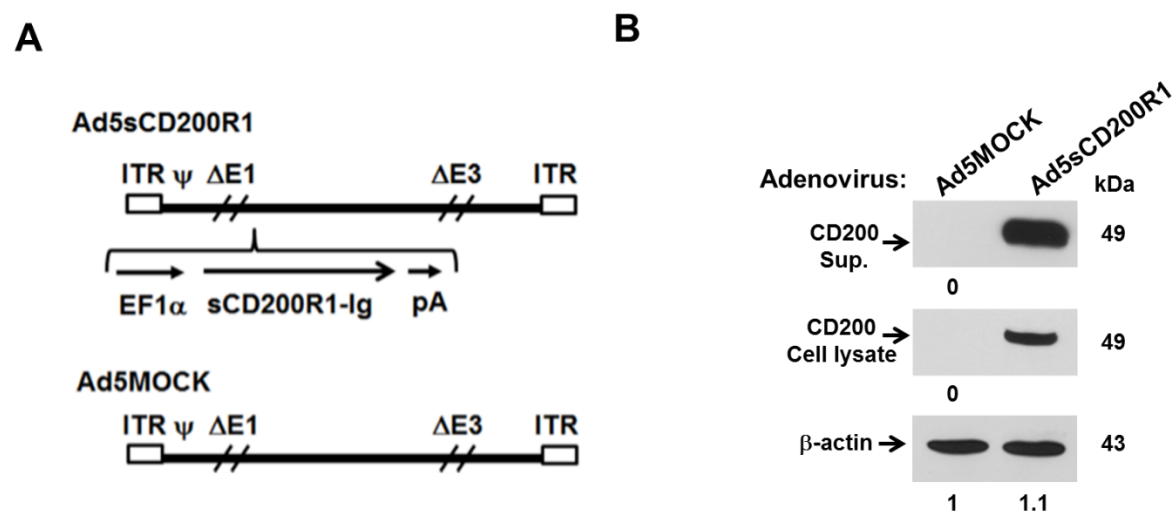

**Figure S4.** Adenovirus over-expressing soluble extracellular domain of CD200. **(A)** An adenovirus encoding the extracellular domain of CD200R1, sCD200R1, was constructed as a fusion protein containing the Fc portion of mouse IgG2a as described in the Materials and methods. The Ad5MOCK adenovirus was produced as a control. **(B)** HEK293 cells were infected with 10 MOI for 24 h to confirm secretion of soluble sCD200R1-Ig into the culture medium. Culture supernatant (Sup.) was collected, and the cells were lysed with RIPA buffer. Total proteins (40  $\mu\text{g}$ ) were resolved for immunoblot analysis.

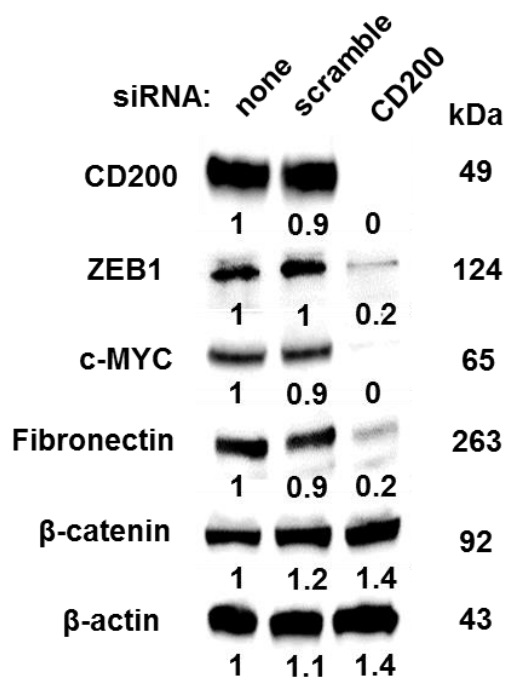

**Figure S5.** Abolition of  $\beta$ -catenin target genes by CD200 siRNA in CD200 endogenous expression cell. NTERA-2 cells were treated with 20 pmoles siRNA and lysed 48 hours later with RIPA buffer. Western blot analysis was performed at 30  $\mu$ g per sample. The changes of  $\beta$ -catenin target genes by siRNA treatment were detected as anti-ZEB1, anti-c-MYC and anti-Fibronectin.

| Adenovirus construction |            |         | sequence                                         |
|-------------------------|------------|---------|--------------------------------------------------|
| Mouse                   | CD200R1    | Forward | 5'- GAA TTC GCC ACC ATG TTT TGC TTT TGG -3'      |
|                         |            | Reverse | 5'- CAA TGG CTC CTC CTC CTC GTA ATG ATT GGT T-3' |
| qRT-PCR                 | EMT gene   |         | sequence                                         |
| Mouse                   | CD200      | Forward | 5'- AAA CAT CCC AGG AAC CCT TG -3'               |
|                         |            | Reverse | 5'- TGT CTT TGT AGG CAG GCT GG -3'               |
|                         | N-cadherin | Forward | 5'-CTT GAA ATC TGC TGG CTC GC-3'                 |
|                         |            | Reverse | 5'-AGG ATG TGC ACG AAG GAC AG-3'                 |
|                         | E-cadherin | Forward | 5'-TGA CGA TGG TGT AGG CGA TG-3'                 |
|                         |            | Reverse | 5'-CAG CCG GTC TTT GAG GGA TT-3'                 |
|                         | vimentin   | Forward | 5'-AAG CGC ACC TTG TCG ATG TA-3'                 |
|                         |            | Reverse | 5'-TGC TTC AAG ACT CGG TGG AC-3'                 |
|                         | GAPDH      | Forward | 5'-CCA CCA CCC TGT TGC TGT AG-3'                 |
|                         |            | Reverse | 5'-CCC ACT CTT CCA CCT TCG AT-3'                 |

**Figure S6.** The primer sequence for adenovirus construction and Quantitative real-time PCR.

Figure 1B

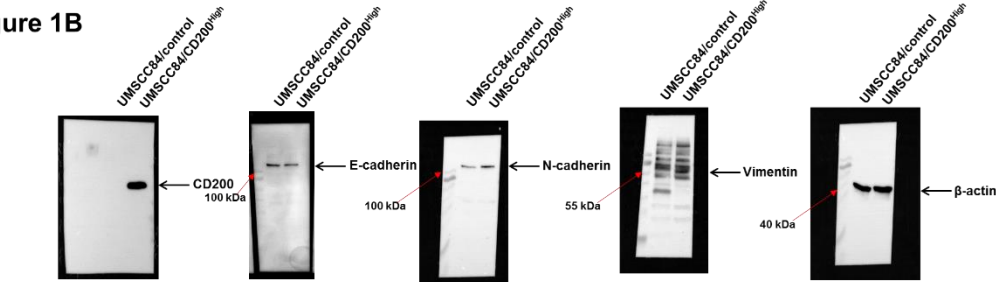

Figure 1C

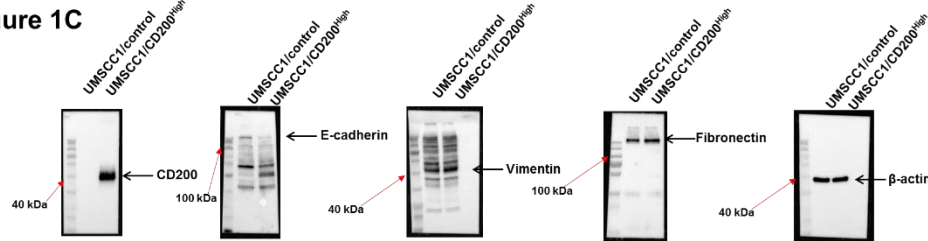

Figure 1D

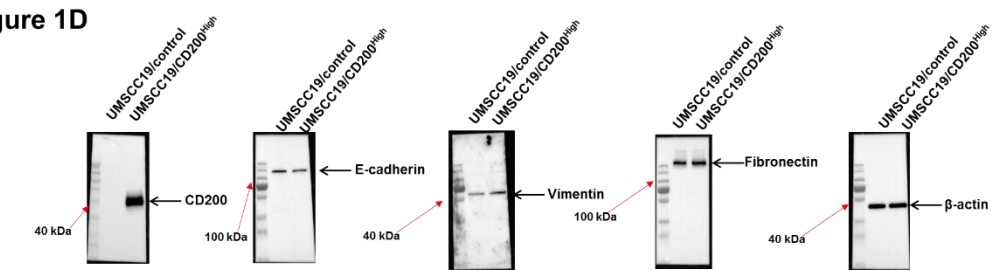

Figure 1E

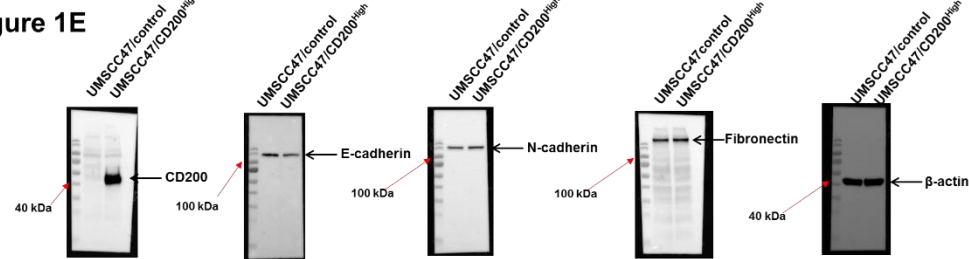

Figure 2C

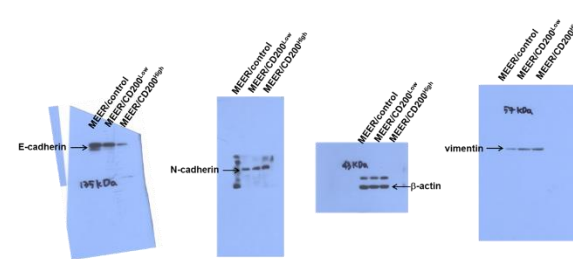

Figure 3A

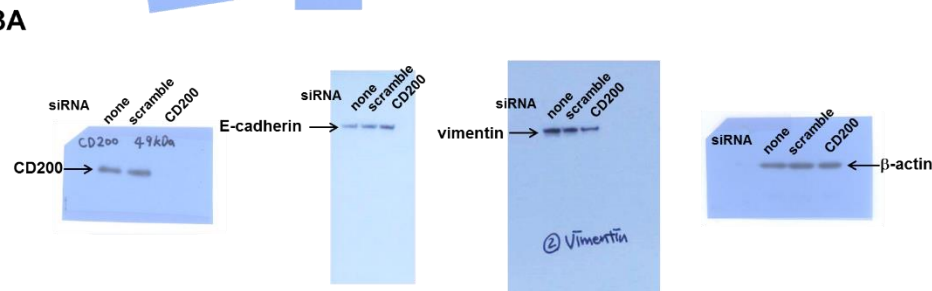

Figure 4A

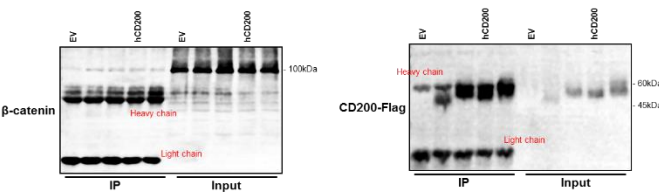

Figure 4B

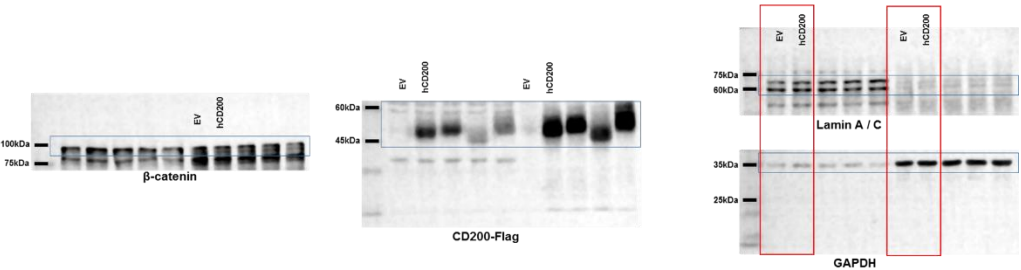

Figure 4E

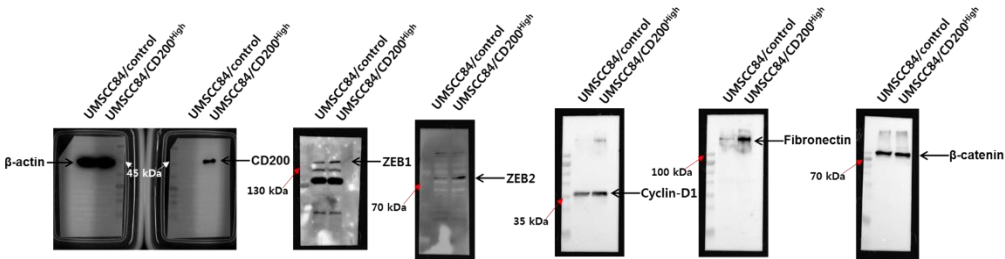

Figure 4F

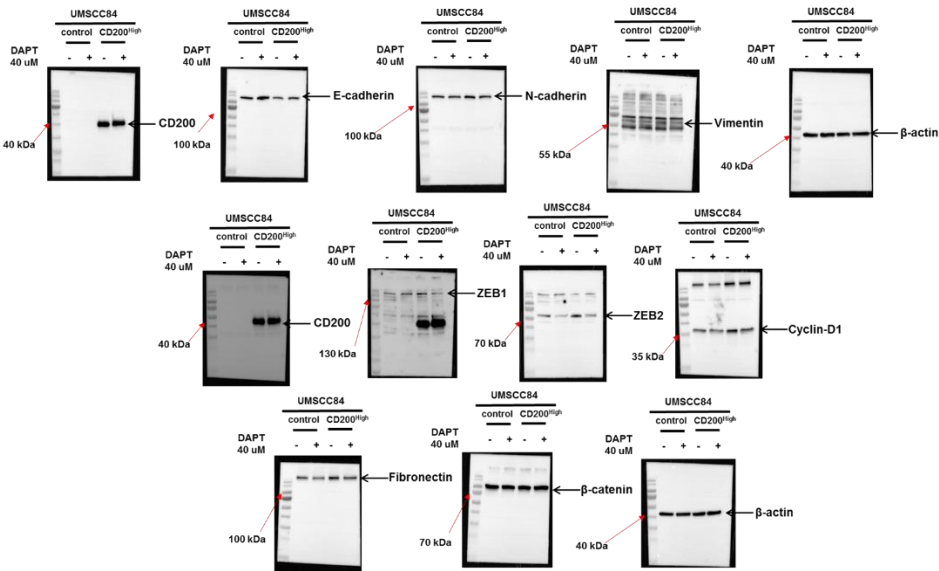

### Supplementary Figure 2A

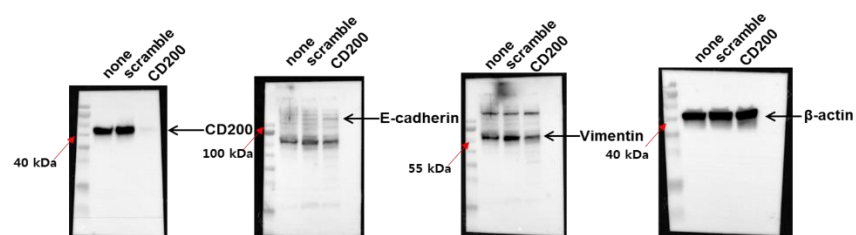

### Supplementary Figure 4B

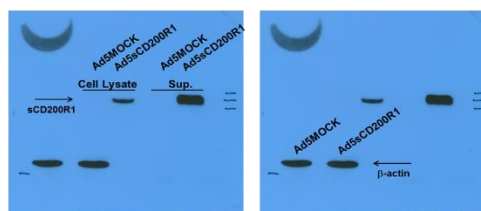

### Supplementary Figure 5A

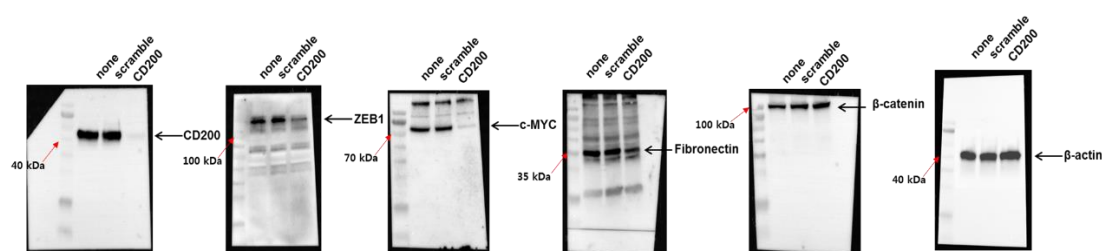

**Figure S7.** Whole blots showing all the bands of Western blotting presented in Supplementary Figures 1B–E, 2C, 3A, 4A, 4B, 4E, 4F, and Supplementary Figures 2A, 4B, 5A.

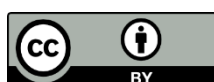

© 2019 by the authors. Licensee MDPI, Basel, Switzerland. This article is an open access article distributed under the terms and conditions of the Creative Commons Attribution (CC BY) license (<http://creativecommons.org/licenses/by/4.0/>).
